# Supplementary material
Source: PubMed Central journal article supplement (PMC4394188)
Supplement: NIHMS670637-supplement.pdf [file NIHMS670637-supplement.pdf]

## Supplemental Data

Table S1, related to Table 1. Characteristics of propensity-matched cases and controls

| Characteristic                                                                                     | All<br>(n = 715) | Matched controls<br>(n = 94; 13%) | Matched SIM cases<br>(n = 94; 13%) | <sup>a</sup> p-value | Unmatched<br>(n = 527; 74%) |
|----------------------------------------------------------------------------------------------------|------------------|-----------------------------------|------------------------------------|----------------------|-----------------------------|
| Male gender                                                                                        | 374 (52%)        | 42 (46%)                          | 48 (51%)                           | 0.460                | 284 (54%)                   |
| Age (years)                                                                                        | 58 (11)          | 60 (15)                           | 57 (15)                            | 0.332                | 58 (15)                     |
| <sup>b</sup> Atorvastatin dose equivalents (mg)                                                    | 20 (10)          | 10 (10)                           | 10 (10)                            | 0.778                | 20 (30)                     |
| Atorvastatin                                                                                       | 392 (55%)        | 64 (68%)                          | 65 (69%)                           | 1.000                | 263 (50%)                   |
| Simvastatin                                                                                        | 143 (20%)        | 11 (12%)                          | 11 (12%)                           |                      | 121 (23%)                   |
| Rosuvastatin                                                                                       | 83 (12%)         | 5 (5%)                            | 5 (5%)                             |                      | 73 (14%)                    |
| Pravastatin                                                                                        | 52 (7%)          | 7 (7%)                            | 7 (7%)                             |                      | 38 (7%)                     |
| Lovastatin                                                                                         | 30 (4%)          | 5 (5%)                            | 4 (4%)                             |                      | 21 (4%)                     |
| Other statin                                                                                       | 15 (2%)          | 2 (2%)                            | 2 (2%)                             |                      | 11 (2%)                     |
| Coronary artery disease                                                                            | 137 (19%)        | 8 (9%)                            | 11 (12%)                           | 0.468                | 118 (22%)                   |
| Myocardial infarction                                                                              | 97 (14%)         | 9 (10%)                           | 13 (14%)                           | 0.364                | 76 (14%)                    |
| Diabetes                                                                                           | 109 (15%)        | 12 (13%)                          | 16 (17%)                           | 0.413                | 81 (15%)                    |
| Hypertension                                                                                       | 338 (47%)        | 29 (31%)                          | 29 (31%)                           | 1.000                | 279 (53%)                   |
| Smoker                                                                                             | 245 (34%)        | 18 (19%)                          | 20 (21%)                           | 0.716                | 206 (39%)                   |
| Family history of heart disease                                                                    | 345 (48%)        | 22 (23%)                          | 22 (23%)                           | 1.000                | 301 (57%)                   |
| Family history of muscle disease                                                                   | 42 (6%)          | 3 (3%)                            | 5 (5%)                             | 0.721                | 34 (6%)                     |
| Metabolic muscle disease                                                                           | 19 (3%)          | 0 (0%)                            | 2 (2%)                             | 0.497                | 17 (3%)                     |
| Inflammatory muscle disease                                                                        | 55 (8%)          | 1 (1%)                            | 1 (1%)                             | 1.000                | 53 (10%)                    |
| Hypothyroidism                                                                                     | 91 (13%)         | 7 (7%)                            | 4 (4%)                             | 0.351                | 80 (15%)                    |
| Heavy alcohol consumption                                                                          | 17 (2%)          | 0 (0%)                            | 3 (3%)                             | 0.246                | 14 (3%)                     |
| Obesity                                                                                            | 122 (17%)        | 5 (5%)                            | 9 (10%)                            | 0.267                | 108 (20%)                   |
| Liver disease                                                                                      | 17 (2%)          | 0 (0%)                            | 4 (4%)                             | 0.121                | 13 (2%)                     |
| Kidney disease                                                                                     | 14 (2%)          | 1 (1%)                            | 1 (1%)                             | 1.000                | 12 (2%)                     |
| <sup>c</sup> Participants taking $\geq 1$ co-medication(s) that could independently cause myopathy | 34 (5%)          | 1 (1%)                            | 1 (1%)                             | 1.000                | 32 (6%)                     |
| <sup>c</sup> Participants taking $\geq 1$ co-medication(s) that could treat SIM                    | 260 (36%)        | 16 (17%)                          | 15 (16%)                           | 0.844                | 229 (43%)                   |

|                                                                                                |          |          |          |       |          |
|------------------------------------------------------------------------------------------------|----------|----------|----------|-------|----------|
| <sup>c</sup> Participants taking $\geq 1$ co-medication(s) that could increase statin exposure | 77 (11%) | 10 (11%) | 10 (11%) | 1.000 | 57 (11%) |
| <sup>c</sup> Participants taking $\geq 1$ co-medication(s) that could decrease statin exposure | 7 (1%)   | 2 (2%)   | 0 (0%)   | 0.497 | 5 (1%)   |

<sup>a</sup>Continuous variables are presented as median (interquartile range) and compared with the Kruskal-Wallis test. Categorical variables are presented as counts (%) and compared with the chi-square or Fisher's exact test where necessary. P-values are for the comparison of matched controls vs matched SIM cases.

<sup>b</sup>Atorvastatin dose equivalents were calculated as follows: fluvastatin dose/8, lovastatin dose/4, pravastatin dose/4, rosuvastatin dose\*4, and simvastatin dose/2 (Stone et al., 2014). Dose equivalents were missing for cerivastatin (n = 6) and pitavastatin (n = 1).

<sup>c</sup>Categories of potentially confounding co-medications are defined in the Supplemental Experimental Procedures.

*GATM* = gene encoding glycine amidinotransferase; SIM = statin-induced myopathy

Table S2, related to Figure 1. Summary of studies of *GATM* variants and statin-induced myopathy

| Reference                                          | SNP       | n cases | n controls | MAF cases | MAF controls | Odds ratio (95% CI) | p-value |
|----------------------------------------------------|-----------|---------|------------|-----------|--------------|---------------------|---------|
| <sup>a</sup> Mangravite et al (2013)<br>Marshfield | rs9806699 | 72      | 220        | 0.21      | 0.30         | 0.61 (0.39-0.95)    | 0.03    |
|                                                    | rs1719247 | 72      | 220        | 0.19      | 0.29         | 0.59 (0.36-0.93)    | 0.02    |
|                                                    | rs1346268 | 72      | 220        | 0.21      | 0.29         | 0.66 (0.41-1.02)    | 0.06    |
| <sup>a</sup> Mangravite et al (2013)<br>SEARCH     | rs1719247 | 100     | 4,021      | 0.17      | 0.25         | 0.61 (0.42-0.88)    | 0.01    |
|                                                    | rs1346268 | 100     | 4,029      | 0.18      | 0.26         | 0.62 (0.43-0.90)    | 0.01    |
| Carr et al (2014)                                  | rs9806699 | 150     | 587        | 0.28      | 0.30         | 0.94 (n/a)          | 0.68    |
| <sup>a</sup> Floyd et al (2014)                    | rs9806699 | 76      | 643        | 0.24      | 0.28         | 0.84 (0.52-1.36)    | 0.49    |
|                                                    | rs1719247 | 76      | 643        | 0.24      | 0.25         | 1.00 (0.64-1.57)    | 0.99    |
|                                                    | rs1346268 | 76      | 643        | 0.24      | 0.27         | 0.88 (0.52-1.36)    | 0.57    |
| <sup>b</sup> Luzum et al (2015)                    | rs9806699 | 306     | 80         | 0.25      | 0.28         | 0.90 (0.60-1.34)    | 0.60    |

CI = confidence interval; *GATM* = gene encoding glycine amidinotransferase; MAF = minor allele frequency; SEARCH = Study of Effectiveness of Additional Reductions in Cholesterol and Homocysteine; SNP = single nucleotide polymorphism

<sup>a</sup>Excluding fibrate users

<sup>b</sup>Excluding patients taking any potentially interacting co-medications, as defined in the Supplemental Experimental Procedures

## **Supplemental Experimental Procedures**

### **Data collection and classification, related to Experimental Procedures: Participants**

The following data was collected from the participants via a standardized questionnaire: demographics, type of statin, statin dose, the presence or absence of 12 specific conditions/events in their past medical history (coronary artery disease, myocardial infarction, diabetes, hypertension, smoking, metabolic muscle disease, inflammatory muscle disease, hypothyroidism, heavy alcohol consumption, obesity, liver disease, and kidney disease), family history of heart or muscle disease, and co-medications. Co-medications were categorized into four groups: 1) co-medications that can independently cause myopathy (*e.g.*, systemic corticosteroids and hydroxy/chloroquine); 2) co-medications that can treat SIM (*e.g.*, analgesics, skeletal muscle relaxants, and coenzyme Q10); 3) co-medications that can increase statin exposure (*e.g.* cytochrome P450 [CYP] 3A4 inhibitors in the participants treated with a CYP3A4-metabolized statin); and 4) co-medications that can decrease statin exposure (*e.g.* CYP3A4 inducers in the participants treated with a CYP3A4-metabolized statin).
